# Supplementary material
Source: PubMed Central journal article supplement (PMC6795539)
Supplement: EMS83864-supplement-Supplementary_Information.pdf [file EMS83864-supplement-Supplementary_Information.pdf]

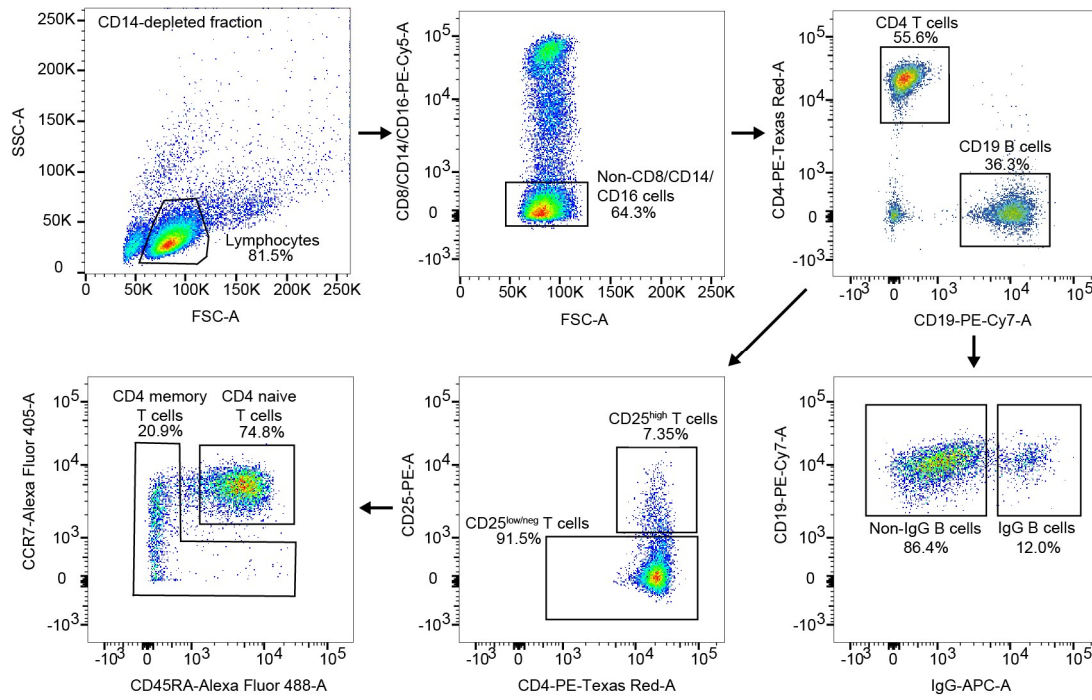

**Supplementary Fig. 1. Sorting strategy of memory IgG<sup>+</sup> B cells and memory CD4<sup>+</sup> T cells from MS patients.** Representative flow cytometry analysis of CD14 depleted PBMCs stained with fluorochrome-labeled mouse monoclonal antibodies. Cells were FACS-sorted after gating on CD8<sup>-</sup>, CD14<sup>-</sup>, CD16<sup>-</sup> population. IgG<sup>+</sup> memory B cells were sorted from CD19<sup>+</sup> B cells. Memory CD4<sup>+</sup> T cells were sorted from the CD4<sup>+</sup>CD25<sup>low/neg</sup> gate (to exclude CD4<sup>+</sup>CD25<sup>bright</sup> T<sub>reg</sub> cells), after removal of naïve CD4<sup>+</sup> T cells (CD45RA<sup>+</sup>CCR7<sup>+</sup>).

**Supplementary Table 1 | Features of the MS patients treated with NZM**

|                                          | Patient A                                        |        | Patient B                               |        |
|------------------------------------------|--------------------------------------------------|--------|-----------------------------------------|--------|
| Gender                                   | Female                                           |        | Female                                  |        |
| Age at MS diagnosis                      | 29                                               |        | 19                                      |        |
| Age at NZM first infusion                | 40                                               |        | 24                                      |        |
| Number of NZM infusions                  | 3*                                               |        | 2*                                      |        |
| Type of hypersensitivity reaction to NZM | Anaphylactoid-like                               |        | Anaphylactoid-like                      |        |
| ▪ Symptoms                               | Urticaria, flushing, shivering and light dyspnea |        | Diffuse urticaria and flushing          |        |
| ▪ Post-infusion therapy                  | Diphenhydramine and prednisolone                 |        | Chlorpheniramine and methylprednisolone |        |
| ADA serum titers (EC50):                 |                                                  |        |                                         |        |
| ▪ IgG                                    | 1/700                                            |        | 1/1000                                  |        |
| ▪ IgM                                    | nd                                               |        | nd                                      |        |
| ▪ IgA                                    | 1/30                                             |        | 1/170                                   |        |
| HLA typing:                              |                                                  |        |                                         |        |
| ▪ HLA-DRB1                               | 14:01P                                           | 16:01  | 07:01                                   | 07:01  |
| ▪ HLA-DQA1                               | 01:04                                            | 01:02  | 02:01                                   | 02:01  |
| ▪ HLA-DQB1                               | 05:03                                            | 05:02  | 02:02                                   | 02:02  |
| ▪ HLA-DPA1                               | 01:03                                            | 01:03  | 02:01                                   | 01:03  |
| ▪ HLA-DPB1                               | 04:01P                                           | 04:02P | 01:01P                                  | 04:01P |
| ▪ HLA-A                                  | 02:01                                            | 03:01  | 03:01                                   | 26:01  |
| ▪ HLA-B                                  | 27:02                                            | 35:03  | 14:01                                   | 57:02  |
| ▪ HLA-C                                  | 02:02                                            | 12:03  | 04:01                                   | 08:02  |

nd = not detected; \*last infusion was incomplete due to hypersensitivity reaction.

**Supplementary Table 2 | Comparison of neutralizing and binding abilities of anti-natalizumab antibodies**

| Patient | Antibody | Type | IC90 (ng/ml) | EC50 (ng/ml) | EC50 <sub>dis</sub> (ng/ml) | k <sub>a</sub> (1/Ms) | k <sub>d</sub> (1/s) | KD (M)  |
|---------|----------|------|--------------|--------------|-----------------------------|-----------------------|----------------------|---------|
|         | NAA104   | BAb  | 100,000.0    | 35.1         | 16,704.0                    | 1.1E+06               | 1.2E-03              | 1.1E-09 |
|         | NAA32    | BAb  | 100,000.0    | 68.1         | 18,663.0                    | 1.2E+06               | 1.0E-03              | 9.0E-10 |
|         | NAA40    | BAb  | 100,000.0    | 103.0        | 37,878.0                    | 1.3E+06               | 5.1E-03              | 3.9E-09 |
|         | NAA94    | BAb  | 100,000.0    | 69.8         | 17,478.0                    | 1.3E+06               | 6.3E-04              | 4.7E-10 |
|         | NAA96    | BAb  | 100,000.0    | 32.6         | 29,967.0                    | 6.8E+05               | 9.0E-05              | 1.3E-10 |
|         | NAA36    | BAb  | 29,485.0     | 83.6         | 100,000.0                   | 2.6E+05               | 1.0E-06              | 1.0E-12 |
|         | NAA2     | BAb  | 24,849.0     | 59.2         | 100,000.0                   | 4.5E+05               | 1.0E-06              | 1.0E-12 |
|         | NAA20    | BAb  | 23,763.0     | 99.0         | 4,227.0                     | 5.1E+05               | 1.1E-04              | 2.2E-10 |
|         | NAA49    | BAb  | 7,965.0      | 51.8         | 100,000.0                   | 6.6E+05               | 2.2E-05              | 3.4E-11 |
|         | NAA110   | BAb  | 7,843.0      | 65.9         | 100,000.0                   | 6.5E+05               | 2.2E-04              | 3.4E-10 |
|         | NAA9     | BAb  | 2,859.0      | 78.6         | 100,000.0                   | 5.7E+05               | 1.3E-04              | 2.3E-10 |
|         | NAA34    | BAb  | 1,611.0      | 51.1         | 2,173.0                     | 9.6E+04               | 6.5E-04              | 6.8E-09 |
|         | NAA59    | NAb  | 271.1        | 31.0         | 220.0                       | 7.1E+05               | 9.1E-07              | 1.3E-12 |
|         | NAA5     | NAb  | 222.3        | 51.0         | 392.0                       | 5.4E+05               | 1.0E-06              | 1.0E-12 |
|         | NAA33    | NAb  | 194.6        | 58.3         | 332.0                       | 4.7E+05               | 1.0E-06              | 1.0E-12 |
| A       | NAA7     | NAb  | 187.9        | 69.5         | 100,000.0                   | 6.2E+05               | 1.0E-06              | 1.0E-12 |
|         | NAA62    | NAb  | 171.2        | 47.4         | 10,339.0                    | 4.6E+05               | 3.6E-05              | 7.8E-11 |
|         | NAA116   | NAb  | 147.3        | 44.0         | 594.2                       | 4.2E+05               | 1.0E-06              | 1.0E-12 |
|         | NAA114   | NAb  | 133.3        | 48.0         | 32,688.0                    | 6.3E+05               | 1.0E-06              | 1.0E-12 |
|         | NAA105   | NAb  | 88.8         | 50.5         | 889.6                       | 6.1E+05               | 4.9E-05              | 8.0E-11 |
|         | NAA84    | NAb  | 69.1         | 36.4         | 434.7                       | 7.6E+05               | 8.4E-06              | 1.1E-11 |
|         | NAA92    | NAb  | 60.8         | 33.2         | 37.6                        | 3.4E+05               | 1.0E-06              | 1.0E-12 |
|         | NAA6     | NAb  | 58.6         | 51.2         | 87.8                        | 4.3E+05               | 1.0E-06              | 1.0E-12 |
|         | NAA113   | NAb  | 57.7         | 30.2         | 589.8                       | 5.6E+05               | 1.0E-06              | 1.0E-12 |
|         | NAA45    | NAb  | 49.4         | 31.4         | 706.0                       | 5.6E+05               | 5.2E-05              | 9.4E-11 |
|         | NAA44    | NAb  | 48.0         | 43.8         | 141.1                       | 8.0E+05               | 1.4E-04              | 1.8E-10 |
|         | NAA119   | NAb  | 45.5         | 52.7         | 262.7                       | 3.6E+05               | 1.0E-06              | 1.0E-12 |
|         | NAA80    | NAb  | 43.7         | 46.0         | 43.0                        | 9.9E+05               | 1.0E-06              | 1.0E-12 |
|         | NAA128   | NAb  | 41.4         | 39.8         | 64.6                        | 5.1E+05               | 1.0E-06              | 1.0E-12 |
|         | NAA125   | NAb  | 17.1         | 48.4         | 531.3                       | 5.2E+05               | 1.0E-06              | 1.0E-12 |
|         | NAE125   | BAb  | 100,000.0    | 24.5         | 100,000.0                   | 7.8E+05               | 2.3E-03              | 2.9E-09 |
|         | NAE194   | BAb  | 100,000.0    | 25.6         | 100,000.0                   | 1.3E+06               | 2.1E-03              | 1.6E-09 |
|         | NAE197   | BAb  | 100,000.0    | 823.3        | 100,000.0                   | 1.5E+06               | 1.6E-03              | 1.1E-09 |
|         | NAE199   | BAb  | 100,000.0    | 23.3         | 15,761.0                    | 1.8E+06               | 2.6E-03              | 1.5E-09 |
| B       | NAE205   | BAb  | 100,000.0    | 736.3        | 100,000.0                   | 2.0E+05               | 5.8E-04              | 2.9E-09 |
|         | NAE206   | BAb  | 100,000.0    | 710.0        | 100,000.0                   | 5.8E+06               | 1.3E-02              | 2.3E-09 |
|         | NAE207   | BAb  | 100,000.0    | 972.6        | 100,000.0                   | 1.4E+06               | 3.1E-03              | 2.2E-09 |
|         | NAE210   | BAb  | 100,000.0    | 17.5         | 100,000.0                   | 2.0E+06               | 8.5E-04              | 4.2E-10 |
|         | NAE208   | BAb  | 100,000.0    | 6,433.0      | 100,000.0                   | 1.9E+05               | 4.4E-03              | 2.3E-08 |
|         | NAE203   | BAb  | 63,640.0     | 18.5         | 5,924.0                     | 2.4E+05               | 9.0E-04              | 3.7E-09 |

IC90 indicates the antibody concentration required for 90% inhibition of NZM binding to T cells.

EC50 indicates half-maximal antibody concentration required to bind to NZM by ELISA.

EC50<sub>dis</sub> values were calculated by NZM ELISA in presence of high-pH dissociation buffer (maximum value 100,000 for no binding).

Kinetics parameters measured by SPR: k<sub>a</sub>, association constant, k<sub>d</sub>, dissociation constant and KD, equilibrium dissociation constant

(when no dissociation is measured, k<sub>d</sub> and KD are set at minimum values of 10<sup>-6</sup> and 10<sup>-12</sup>, respectively).

NAb, neutralizing antibody (IC90 < 1,000 ng/ml). BAb, binding (non-neutralizing) antibody (IC90 > 1,000 ng/ml, maximum 100,000).

Values are shown with a two-color gradation scale from minimum (green) to maximum (red).

**Supplementary Table 3 | Data collection and refinement statistics (molecular replacement)**

|                                                     | NZM-NAA32           | NZM-NAA84          |
|-----------------------------------------------------|---------------------|--------------------|
| <b>Data collection</b>                              |                     |                    |
| Space group                                         | P4212               | P21                |
| Cell dimensions                                     |                     |                    |
| <i>a</i> , <i>b</i> , <i>c</i> (Å)                  | 189.1, 189.1, 87.26 | 105.4, 66.6, 199.5 |
| $\alpha$ , $\beta$ , $\gamma$ (°)                   | 90, 90, 90          | 90, 98.9, 90       |
| Resolution (Å)                                      | 1.96 (2.22-1.96)    | 2.74 (3.14-2.79)   |
| <i>R</i> <sub>merge</sub>                           | 0.132 (1.529)       | 0.143 (0.583)      |
| <i>I</i> / $\sigma$                                 | 11.9 (1.8)          | 6.3 (1.8)          |
| Completeness (%)                                    | 99.8 (100)          | 98.6 (99.2)        |
| Redundancy                                          | 8 (12.5)            | 3 (3.1)            |
| <b>Refinement</b>                                   |                     |                    |
| Resolution (Å)                                      | 2.0                 | 2.8                |
| No. reflections                                     | 63528               | 40000              |
| <i>R</i> <sub>work</sub> / <i>R</i> <sub>free</sub> | 0.266 / 0.285       | 0.238 / 0.263      |
| No. atoms                                           |                     |                    |
| Protein                                             | 6714                | 13096              |
| Ligand/ion                                          | 18                  | 0                  |
| Water                                               | 253                 | 0                  |
| <i>B</i> -factors                                   |                     |                    |
| Protein                                             | 39.3                | 56.8               |
| Ligand/ion                                          | 48.5                | na                 |
| Water                                               | 33.5                | na                 |
| R.m.s. deviations                                   |                     |                    |
| Bond lengths (Å)                                    | 0.008               | 0.007              |
| Bond angles (°)                                     | 1.08                | 1.03               |

One crystal for each complex was used to solve the structures.  
Values in parentheses are for highest-resolution shell. na, not applicable.

**Supplementary Table 4 | TCR V $\beta$  sequence analysis and MHC restriction of NZM-reactive T cell clones**

| Patient | Nr. of clones | V $\beta$ gene | J $\beta$ gene | V $\beta$ CDR3     | Specificity | Epitope              | Start | End | MHC restriction |
|---------|---------------|----------------|----------------|--------------------|-------------|----------------------|-------|-----|-----------------|
| A       | 6             | V2             | J2-3           | CASGFTDTQYF        | NZM LC      | GKAPRLLIHYTSALQPGI   | 41    | 58  | HLA-DR          |
|         | 1             | V7-2           | J2-3           | CASSLYSGANTDTQYF   | NZM LC      | GKAPRLLIHYTSALQPGI   | 41    | 58  | HLA-DR          |
|         | 3             | V7-3           | J1-2           | CASSQRDSPYTF       | NZM LC      | GKAPRLLIHYTSALQ      | 41    | 55  | nd              |
|         | 1             | V11-2          | J1-5           | CASSLDNGAGYNQPHHF  | NZM LC      | KYMAWYQQTPGKAPR      | 31    | 45  | nd              |
|         | 1             | V20-1          | J1-5           | CSASTRQGVGRNQPHHF  | NZM LC      | GKAPRLLIHYTSALQPGIPS | 41    | 60  | HLA-DR          |
| B       | 3             | V28            | J1-5           | CASSPAGAYSNQPQHF   | NZM HC      | PGQRLEWMGRIDPAN      | 41    | 55  | nd              |
|         | 1             | V3-1           | J1-4           | CASSPPGVANEKLF     | NZM LC      | KYMAWYQQTPGKAPR      | 31    | 45  | HLA-DR          |
|         | 11            | V12-3          | J2-1           | CASSPTGTGLNEQFF    | NZM LC      | GKAPRLLIHYTSALQPGI   | 41    | 58  | HLA-DR          |
|         | 2             | V12-3          | J2-7           | CASSPTGTGLTEQYF    | NZM LC      | GKAPRLLIHYTSALQPGI   | 41    | 58  | HLA-DR          |
|         | 2             | V12-4          | J1-3           | CASSXPPGRVGGNTIYF* | NZM LC      | GKAPRLLIHYTSALQPGI   | 41    | 58  | nd              |
|         | 1             | V5-1           | J1-5           | CASSYLPDSNQPQHF    | NZM LC      | GKAPRLLIHYTSALQPGI   | 41    | 58  | HLA-DR          |
|         | 7             | V29-1          | J2-7           | CSVAQGGGSYEQYF     | NZM LC      | PRLLIHYTSALQPGI      | 44    | 58  | HLA-DR          |

LC, light chain; HC, heavy chain. Start and end position of the epitope residues in the NZM chains are indicated. nd, not determined. \*X can be either S or Y.

**Supplementary Table 5 | NZM peptides identified by mass spectrometry-based peptidomics**

| Protein         | Peptide sequence        | Start | End | Length | Identification (patient-replicate) |        |        |        | Uniquely present in NZM |
|-----------------|-------------------------|-------|-----|--------|------------------------------------|--------|--------|--------|-------------------------|
|                 |                         |       |     |        | A-rep1                             | A-rep2 | B-rep1 | B-rep2 |                         |
| NZM heavy chain | DTYIHVVRQAPGQR          | 31    | 44  | 14     |                                    |        | +      |        | *                       |
| NZM heavy chain | DTSASTAYMELSSLRSEDT     | 73    | 91  | 19     | +                                  |        |        |        |                         |
| NZM heavy chain | ASTAYMELSSLRSEDT        | 76    | 91  | 16     | +                                  | +      |        |        |                         |
| NZM heavy chain | ASTAYMELSSLRSEDTA       | 76    | 92  | 17     | +                                  | +      |        |        |                         |
| NZM heavy chain | STAYMELSSLRSED          | 77    | 90  | 14     | +                                  | +      |        |        |                         |
| NZM heavy chain | STAYMELSSLRSEDT         | 77    | 91  | 15     | +                                  | +      |        |        |                         |
| NZM heavy chain | STAYMELSSLRSEDTA        | 77    | 92  | 16     | +                                  | +      |        |        |                         |
| NZM heavy chain | TAYMELSSLRSEDT          | 78    | 91  | 14     | +                                  |        |        |        |                         |
| NZM heavy chain | GQGLTVTVSSASTKGP        | 114   | 129 | 16     | +                                  |        |        |        | *                       |
| NZM heavy chain | GQGLTVTVSSASTKGPS       | 114   | 130 | 17     | +                                  |        |        |        | *                       |
| NZM heavy chain | GQGLTVTVSSASTKGP        | 115   | 129 | 15     | +                                  | +      |        |        | *                       |
| NZM heavy chain | GQGLTVTVSSASTKGPS       | 115   | 130 | 16     | +                                  | +      |        |        | *                       |
| NZM light chain | TPGKAPRLLIHYTSALQP      | 39    | 56  | 18     | +                                  |        |        |        | *                       |
| NZM light chain | TPGKAPRLLIHYTSALQPG     | 39    | 57  | 19     | +                                  |        | +      |        | *                       |
| NZM light chain | TPGKAPRLLIHYTSALQPGIPS  | 39    | 60  | 22     | +                                  |        |        |        | *                       |
| NZM light chain | TPGKAPRLLIHYTSALQPGIPSR | 39    | 61  | 23     | +                                  | +      |        |        | *                       |
| NZM light chain | KAPRLLIHYTSALQPG        | 42    | 57  | 16     |                                    | +      |        |        | *                       |
| NZM light chain | APRLLIHYTSALQP          | 43    | 56  | 14     | +                                  | +      |        |        | *                       |
| NZM light chain | APRLLIHYTSALQPG         | 43    | 57  | 15     | +                                  | +      |        |        | *                       |
| NZM light chain | APRLLIHYTSALQPGIPS      | 43    | 60  | 18     | +                                  |        |        |        | *                       |
| NZM light chain | TFTISSLQPEDIAT          | 72    | 85  | 14     | +                                  |        |        |        | *                       |

Start/end position and length of the peptide residues in the NZM chains are indicated. + indicates identification of a peptide in an experiment replicate.  
\* indicates a peptide belonging uniquely to NZM and not to the B cell receptors of the antigen-presenting cells.
